# Supplementary material
Source: PubMed Central journal article supplement (PMC3430331)
Supplement: JB.00903-12_zjb999091821so1.pdf [file JB.00903-12_zjb999091821so1.pdf]

**Supplemental materials:**

**The periplasmic nitrate reductase Nap is required for anaerobic growth  
and involved in redox control of magnetite biomineralization in  
*Magnetospirillum gryphiswaldense***

**Running title:** Denitrification and magnetite biomineralization

Yingjie Li<sup>1</sup>, Emanuel Katzmann<sup>1</sup>, Sarah Borg<sup>1</sup>, and Dirk Schüler<sup>1#</sup>

Ludwig-Maximilians-Universität München, Department Biologie I,  
Mikrobiologie, Großhaderner Str. 4, 82152 Planegg-Martinsried, Germany<sup>1</sup>

**#Corresponding author:** Dirk Schüler

e-mail: [dirk.schueler@lmu.de](mailto:dirk.schueler@lmu.de)

Tel: +4989218074502

Fax: +4989218074515

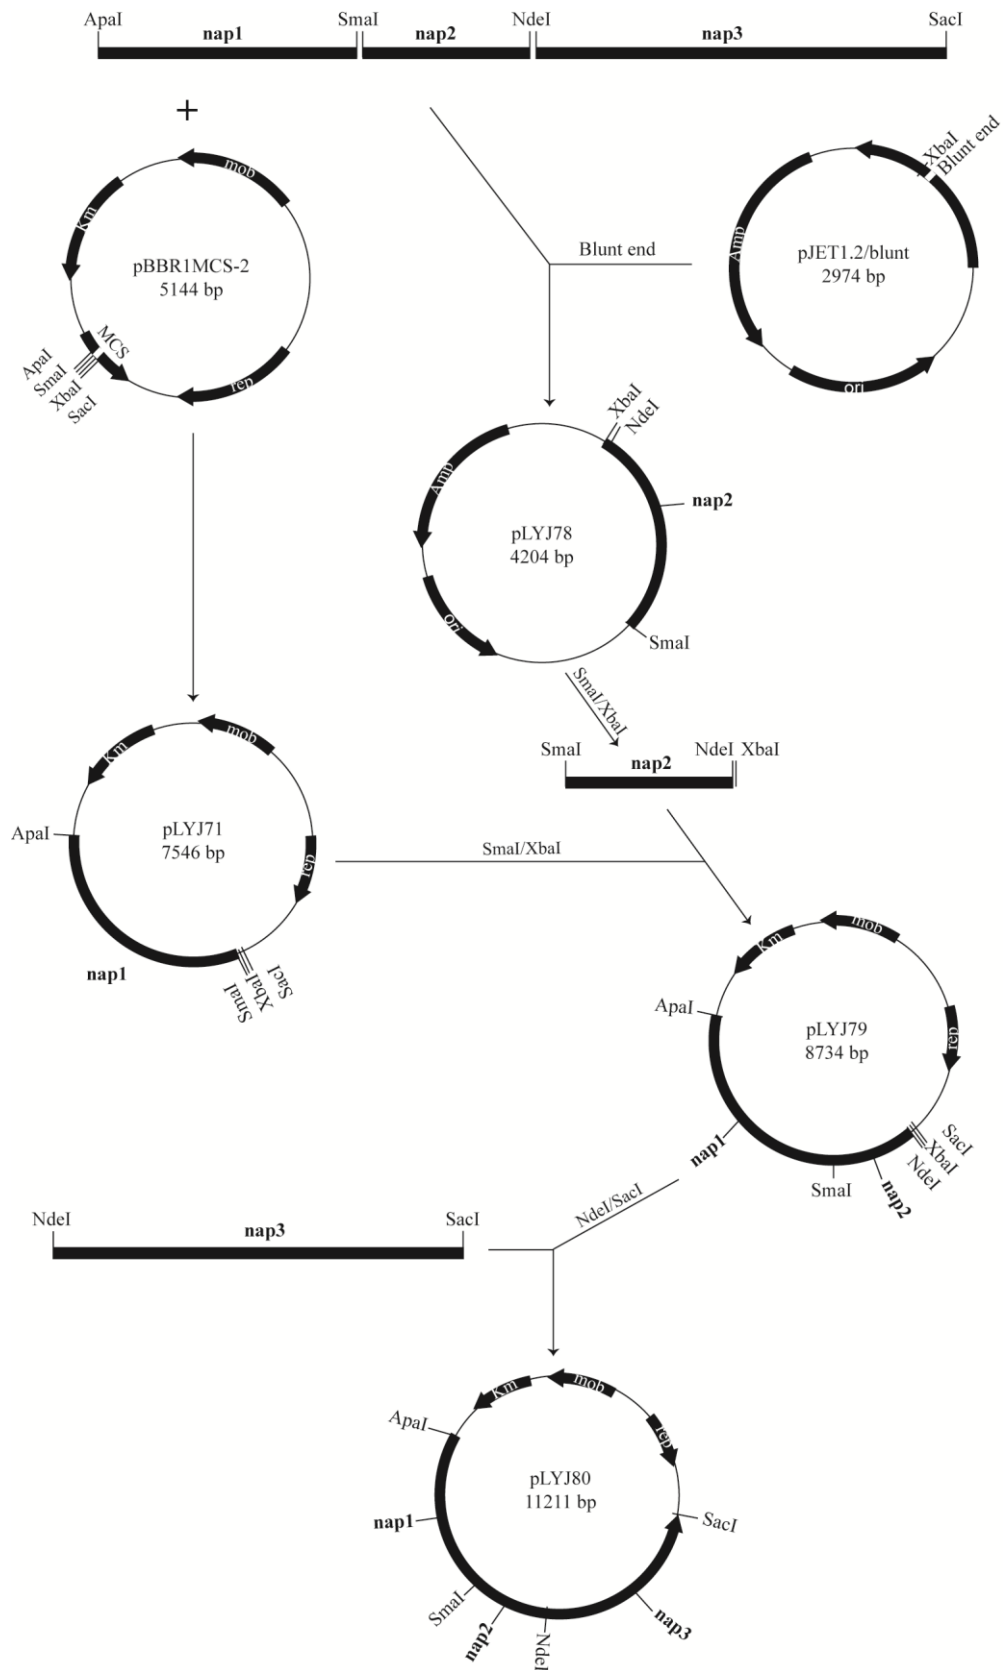

Fig. S1. Scheme for the construction of the large complementation plasmid pLYJ80 (about 11 kb) for  $\Delta nap$ .

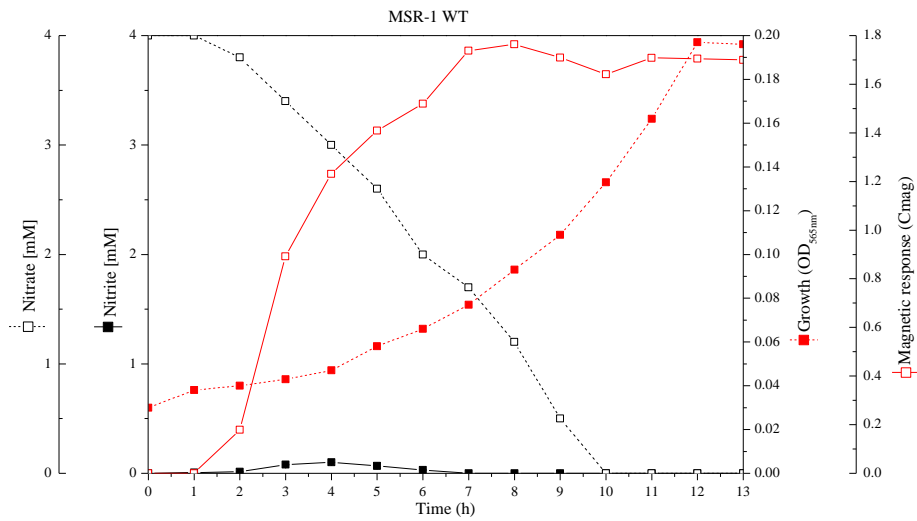

Fig. S2. Nitrate utilization in WT with an initial nitrate concentration of 4 mM (nitrate medium).

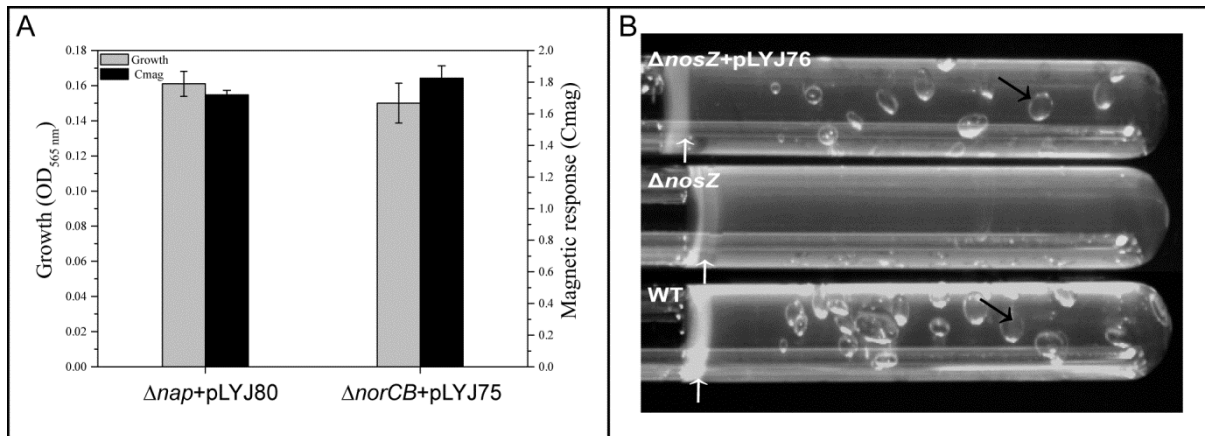

Fig. S3. (A) Growth (OD<sub>565 nm</sub>) and magnetic response (Cmag) of  $\Delta nap+pLYJ80$  and  $\Delta norCB+pLYJ75$  under anaerobic conditions.  $\Delta nap+pLYJ80$  and  $\Delta norCB+pLYJ75$  represented mutant cells harboring their respective WT alleles. (B) Gas production assay in WT,  $\Delta nosZ$  and  $\Delta nosZ+pLYJ76$  in semisolid agar.  $\Delta nosZ+pLYJ76$  represented *nosZ* mutant cell harboring a WT *nosZ* allele. Cells grew as bands (white arrows), and bubbles (black arrows) were detected in WT and complemented *nosZ* strain cultures but not in  $\Delta nosZ$  mutant.

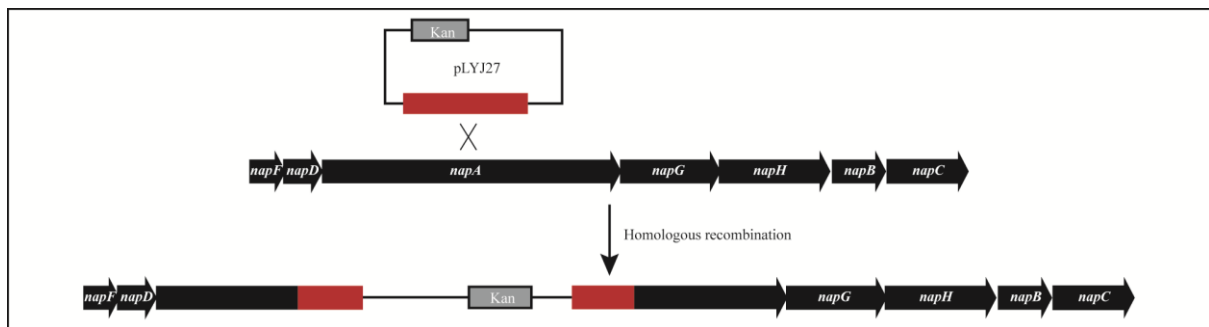

Fig. S4. Schematic representation of steps employed for the interruption of *napA* (*napA::kanR*) in MSR-1. The insertion mutant showed WT-like growth and Cmag values. Under microaerobic and anaerobic conditions, it still consumed nitrate like the WT (data not shown).

Table S1. Bacterial strains used in this work

| Strain                             | Important feature (s)                                                                                                                                                                           | Source or reference                       |
|------------------------------------|-------------------------------------------------------------------------------------------------------------------------------------------------------------------------------------------------|-------------------------------------------|
| <i>E. coli</i> strain DH5 $\alpha$ | F' $\Phi$ 80dlacZ $\Delta$ M15 $\Delta$ (lacZYA-argF)U169 deoR<br>recA1 endA1 hsdR17 (r <sub>k</sub> <sup>-</sup> , m <sub>k</sub> <sup>+</sup> ) phoA supE44 $\lambda$ -<br>thi-1 gyrA96 relA1 | Invitrogen                                |
| <i>E. coli</i> strain BW29427      | dap auxotroph derivative of <i>E. coli</i> strain B2155                                                                                                                                         | K. Datsenko and B. L. Wanner, unpublished |
| MSR-1 WT                           | Wild type R3/S1, but Rif <sup>r</sup> , Sm <sup>r</sup>                                                                                                                                         | (8)                                       |
| $\Delta$ nirS $\Delta$ norCB       | R3/S1 $\Delta$ nirS $\Delta$ norCB                                                                                                                                                              | Y. Li and D. Schüler, unpublished data    |
| napA::kanR                         | R3/S1 nap::pLYJ27                                                                                                                                                                               | This study                                |
| $\Delta$ nap-up                    | R3/S1 nap::pLYJ85                                                                                                                                                                               | This study                                |
| $\Delta$ nap-up-down               | R3/S1 nap::pLYJ85::pLYJ92                                                                                                                                                                       | This study                                |
| $\Delta$ nap                       | R3/S1 $\Delta$ nap                                                                                                                                                                              | This study                                |
| $\Delta$ norCB                     | R3/S1 $\Delta$ norCB                                                                                                                                                                            | This study                                |
| $\Delta$ nosZ                      | R3/S1 $\Delta$ nosZ                                                                                                                                                                             | This study                                |

Table S2. Plasmids used in this work

| Plasmid       | Important feature (s)                                                                                                                                    | Source or reference |
|---------------|----------------------------------------------------------------------------------------------------------------------------------------------------------|---------------------|
| pJET1.2/blunt | Amp <sup>r</sup> , <i>eco47IR</i> (lethal restriction enzyme gene), <i>rep</i> (pMB-1)                                                                   | Fermentas           |
| pCM184        | Broad-host-range allelic exchange vector, Amp <sup>r</sup> , Km <sup>r</sup> , Tc <sup>r</sup>                                                           | (5)                 |
| pBBR1MCS-2    | Km <sup>r</sup> , mobilizable broad-host-range vector                                                                                                    | (3)                 |
| pK19mobGII    | -                                                                                                                                                        | (2)                 |
| pAL01         | Km <sup>r</sup> , pK19mobGII vector (Km <sup>r</sup> , pMB-1 replicon, <i>gusA</i> , <i>lacZ</i> ) containing a 2 kb fragment upstream of <i>mgr4019</i> | (4)                 |
| pAL02/2       | Gm <sup>r</sup> , pT18mob2 vector containing a 2 kb fragment downstream of <i>mgr4019</i>                                                                | (4)                 |
| pCM157        | Tc <sup>r</sup> , Cre recombinase expression vector                                                                                                      | (5)                 |
| pLYJ27        | pCM184 plus <i>napA</i> 2-kb upstream and internal region                                                                                                | This study          |
| pLYJ31        | pCM184 plus <i>norCB</i> 2-kb upstream region                                                                                                            | This study          |
| pLYJ32        | pCM184 plus <i>nosZ</i> 2-kb downstream region                                                                                                           | This study          |
| pLYJ34        | pLYJ31 plus <i>norCB</i> 2-kb downstream region                                                                                                          | This study          |
| pLYJ35        | pLYJ32 plus <i>nosZ</i> 2-kb upstream region                                                                                                             | This study          |
| pLYJ71        | pBBR1MCS-2 plus <i>nap1</i> with its own promoter                                                                                                        | This study          |
| pLYJ75        | pBBR1MCS-2 plus <i>norCB</i> with its own promoter                                                                                                       | This study          |
| pLYJ76        | pBBR1MCS-2 plus <i>nosZ</i> with its own promoter                                                                                                        | This study          |
| pLYJ78        | pJET1.2/blunt plus <i>nap2</i>                                                                                                                           | This study          |
| pLYJ79        | pLYJ71 plus <i>nap2</i> from pLYJ78                                                                                                                      | This study          |
| pLYJ80        | PLYJ78 plus <i>nap3</i>                                                                                                                                  | This study          |
| pLYJ85        | pAL01 plus <i>nap</i> 2-kb upstream region                                                                                                               | This study          |
| pLYJ92        | pAL02/2 plus <i>nap</i> 2-kb downstream region                                                                                                           | This study          |
| pLYJ97        | pBBR1MCS-2 plus <i>gusA</i> from pK19mobGII                                                                                                              | This study          |
| pLYJ94        | pLYJ97 plus <i>nirS</i> promoter region                                                                                                                  | This study          |
| pLYJ98        | pLYJ97 plus <i>nap</i> promoter region                                                                                                                   | This study          |
| pLYJ99        | pLYJ97 plus <i>norCB</i> promoter region                                                                                                                 | This study          |
| pLYJ100       | pLYJ97 plus <i>nosZ</i> promoter region                                                                                                                  | This study          |

Table S3. Effect of different electron acceptors and oxygen on growth and magnetic response

| Culture condition   | Nitrogen source            | Growth ( $\Delta OD_{565 \text{ nm}}^a$ ) | Magnetic response (Cmag) |
|---------------------|----------------------------|-------------------------------------------|--------------------------|
| <b>Anaerobic</b>    | 4 mM $\text{NO}_3^-$       | $0.18 \pm 0.02$                           | $1.8 \pm 0.2$            |
|                     | 1 mM $\text{NO}_2^-$       | $0.01 \pm 0.00$                           | $1.7 \pm 0.0$            |
|                     | 10 mM $\text{N}_2\text{O}$ | $0.01 \pm 0.000$                          | $1.7 \pm 0.0$            |
|                     | 4 mM $\text{NH}_4^+$       | 0                                         | ND <sup>b</sup>          |
| <b>Microaerobic</b> | 4 mM $\text{NO}_3^-$       | $0.23 \pm 0.01$                           | $2.1 \pm 0.2$            |
|                     | 4 mM $\text{NH}_4^+$       | $0.17 \pm 0.06$                           | $2.0 \pm 0.2$            |
| <b>Aerobic</b>      | 4 mM $\text{NO}_3^-$       | $1.21 \pm 0.04$                           | 0                        |
|                     | 4 mM $\text{NH}_4^+$       | $1.25 \pm 0.07$                           | 0                        |

<sup>a</sup> Values represent means and standard deviations were obtained with triplicate cultures and repeated three times.

<sup>b</sup> Cmag value was not tested.

Table S4. BlastP analysis results of denitrification genes in MTB and non-MTB using MSR-1 as a query.

| Gene in MSR-1    | Encoded gene product (aa, kDa, pI)                                                                                          | AMB-1 (e-value, similarity)                        | MS-1 (e-value, similarity)        | MC-1 (e-value, similarity)    | Best hit in non-MTB (e-value, similarity)           |
|------------------|-----------------------------------------------------------------------------------------------------------------------------|----------------------------------------------------|-----------------------------------|-------------------------------|-----------------------------------------------------|
| <i>mgr_4000*</i> | NapF, small transmembrane protein of unknown function (7) (102, 10.17, 8.67)                                                | <i>amb2692</i> (1e-18, 64%) <sup>b</sup>           | <i>BAB59020.1</i> (4e-13, 67%)    | <i>mmc1_1591</i> (2e-10, 62%) | <i>Serratia odorifera</i> 4Rx13 (1e-18, 64%)        |
| <i>mgr_4001*</i> | NapD, cytoplasmic protein (7) (102, 11.21, 4.91)                                                                            | <i>amb2691</i> (5e-43, 76%)                        | <i>magn03008202</i> (2e-41, 77%)  | <i>mmc1_1592</i> (8e-07, 54%) | <i>Beggiatoa</i> sp. PS (9e-17, 62%)                |
| <i>mgr_4002*</i> | NapA, nitrate reductase (NR) catalytic subunit containing molybdenum cofactor and a [4Fe-4S] cluster (6) (835, 93.60, 8.70) | <i>amb2690</i> (0, 91%)                            | <i>magn03008203</i> (0, 91%)      | <i>mmc1_1591</i> (0, 83%)     | <i>Azoarcus</i> sp. BH72 (0, 85%)                   |
| <i>mgr_4003*</i> | NapG, soluble protein (1) (272, 28.92, 7.44)                                                                                | <i>amb2689</i> (2e-125, 78%)                       | <i>magn03008204</i> (4e-124, 79%) | <i>mmc1_1590</i> (4e-93, 71%) | <i>Laribacter hongkongensis</i> HLHK9 (3e-111, 78%) |
| <i>mgr_4004*</i> | NapH, membrane protein (1) (304, 32.72, 9.42)                                                                               | <i>amb2688</i> (9e-132, 77%)                       | <i>magn03008205</i> (3e-125, 77%) | <i>mmc1_1589</i> (4e-85, 65%) | <i>Dechloromonas aromatica</i> RCB (3e-112, 70%)    |
| <i>mgr_4005*</i> | NapB, NR subunit, a c-type cytochrome (6) (148, 16.44, 8.66)                                                                | <i>amb2687</i> (1e-63, 79%)                        | <i>magn03008206</i> (1e-66, 79%)  | <i>mmc1_1588</i> (8e-31, 56%) | <i>Pseudovibrio</i> sp. JE062 (5e-38, 65%)          |
| <i>mgr_4006*</i> | NapC, a membrane-bound tetraheme (6) (222, 25.53, 8.91)                                                                     | <i>amb2686</i> (3e-115, 87%)                       | <i>magn03008207</i> (4e-114, 87%) | <i>mmc1_1587</i> (4e-77, 72%) | <i>Pseudovibrio</i> sp. JE062 (4e-90, 71%)          |
| <i>mgr_1052</i>  | Nitrite reductase, NirS (540, 59.26, 8.81)                                                                                  | <i>amb1395</i> (0, 91%)<br><i>amb4165</i> (0, 78%) | <i>magn03008451</i> (0, 91%)      | –                             | <i>Dechlorosoma suillum</i> PS (0, 90%)             |



|                  |                                                              |                                 |                                                                         |                                  |                                                     |
|------------------|--------------------------------------------------------------|---------------------------------|-------------------------------------------------------------------------|----------------------------------|-----------------------------------------------------|
| <i>mgr_3484*</i> | Nitric-oxide reductase subunit C, NorC<br>(149, 16.23, 6.90) | <i>amb2945</i><br>(5e-84, 88%)  | –                                                                       | <i>mmc_0121</i><br>(4e-57, 72%)  | <i>Nitrosococcus halophilus</i> Nc4<br>(1e-74, 81%) |
| <i>mgr_3485*</i> | Nitric-oxide reductase subunit B, NorB<br>(445, 50.35, 8.82) | <i>amb2944</i><br>(0, 93%)      | –                                                                       | <i>mmc_0120</i><br>(1e-179, 73%) | <i>Azospirillum sp.</i> B510<br>(0, 87%)            |
| <i>mgr_3486</i>  | NorQ<br>(262, 28.95, 5.40)                                   | <i>amb2943</i><br>(1e-151, 90%) | –                                                                       | <i>mmc_0119</i><br>(1e-108, 77%) | <i>Halomonas halodenitrificans</i><br>(1e-144, 86%) |
| <i>mgr_3487</i>  | NorD<br>(632, 70.80, 7.75)                                   | <i>amb2942</i><br>(0, 78%)      | –                                                                       | <i>mmc_0117</i><br>(2e-64, 51%)  | <i>Nitrosococcus halophilus</i> Nc4<br>(0, 70%)     |
| <i>mgr_2761*</i> | Nitrous-oxide reductase, NosZ<br>(760, 83.78, 6.06)          | <i>amb3086</i><br>(0, 90%)      | <i>magn03008954</i><br>(9e-145, 92%)<br><i>magn03007281</i><br>(0, 88%) | –                                | <i>Dechlorosoma suillum</i> PS<br>(0, 86%)          |

\*indicate genes deleted.

## REFERENCES

1. **Berks BC, Ferguson SJ, Moir JW, Richardson DJ.** 1995. Enzymes and associated electron transport systems that catalyse the respiratory reduction of nitrogen oxides and oxyanions. *Biochim. Biophys. Acta* **1232**:97-173.
2. **Katzen F, Becker A, Ielmini MV, Oddo CG, Ielpi L.** 1999. New mobilizable vectors suitable for gene replacement in gram-negative bacteria and their use in mapping of the 3' end of the *Xanthomonas campestris* pv. *campestris* *gum* operon. *Appl. Environ. Microbiol.* **65**:278-282.
3. **Kovach ME, et al.** 1995. Four new derivatives of the broad-host-range cloning vector pBBR1MCS, carrying different antibiotic-resistance cassettes. *Gene* **166**:175-176.
4. **Lohsse A, et al.** 2011. Functional analysis of the magnetosome island in *Magnetospirillum gryphiswaldense*: the *mamAB* operon is sufficient for magnetite biomineralization. *PLoS One* **6**:e25561.
5. **Marx C, Lidstrom M.** 2002. Broad-host-range *cre-lox* system for antibiotic marker recycling in Gram-negative bacteria. *BioTechniques* **33**:1062-1067.
6. **Moreno-Vivian C, Cabello P, Martinez-Luque M, Blasco R, Castillo F.** 1999. Prokaryotic nitrate reduction: molecular properties and functional distinction among bacterial nitrate reductases. *J. Bacteriol.* **181**:6573-6584.
7. **Reyes F, Gavira M, Castillo F, Moreno-Vivian C.** 1998. Periplasmic nitrate-reducing system of the phototrophic bacterium *Rhodobacter sphaeroides* DSM 158: transcriptional and mutational analysis of the *napKEFDABC* gene cluster. *Biochem. J.* **331 ( Pt 3)**:897-904.
8. **Schultheiss D, Kube M, Schüler D.** 2004. Inactivation of the flagellin gene *flaA* in *Magnetospirillum gryphiswaldense* results in nonmagnetotactic mutants lacking flagellar filaments. *Appl. Environ. Microbiol.* **70**:3624-3631.
